# Supplementary material
Source: publisher figshare collection journal article supplement (https://frontiersin.figshare.com/ndownloader/files/17291927)
Supplement: Supplementary file [file 17291927]

# Separate neural systems value prosocial behaviors and reward: An ALE meta-analysis

## Supplementary Material

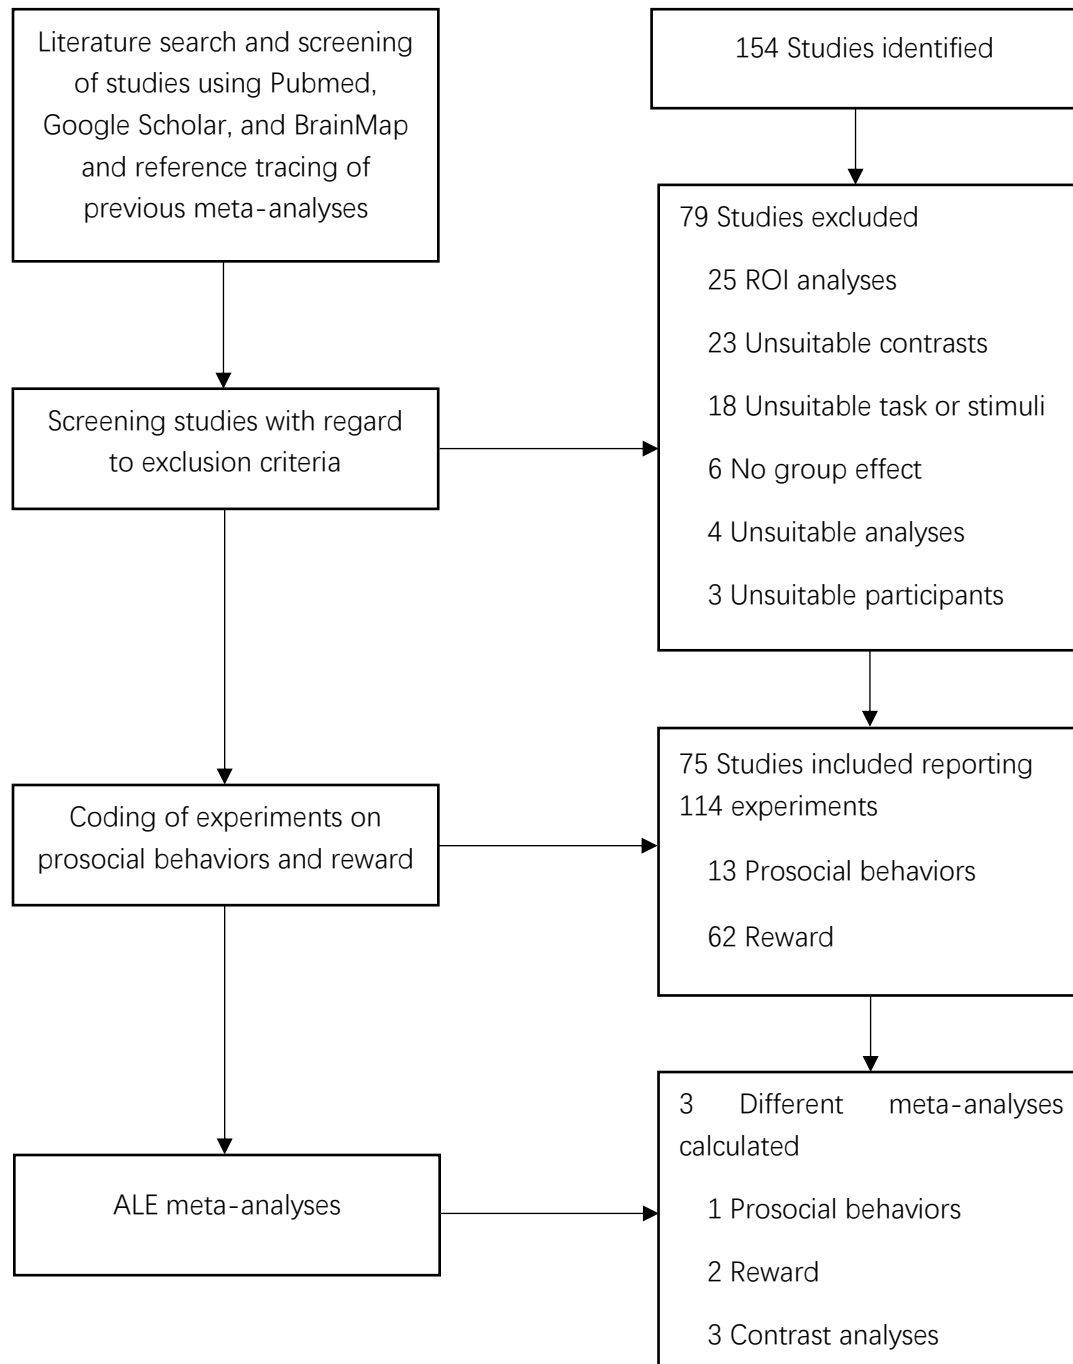

Figure S1. Flowchart of the different steps conducted.

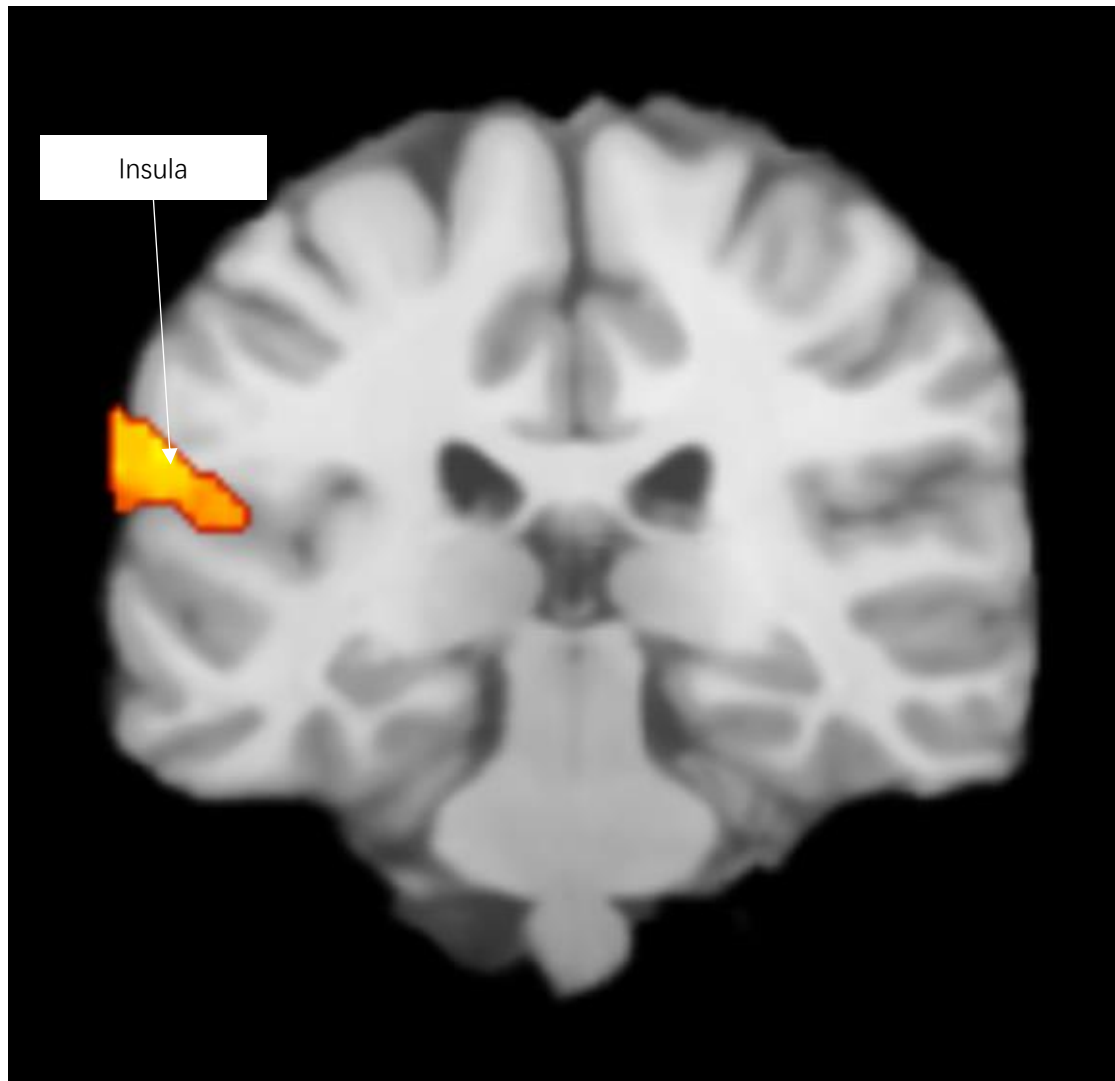

Figure S2. Significant clusters in the ALE contrast meta-analysis showing patterns of specific activation for prosocial behaviors experiments (Clusters in the contrast analyses were thresholded at uncorrected  $p < 0.05$  with 5000 permutations and a minimum cluster size of  $50\text{mm}^3$ ).

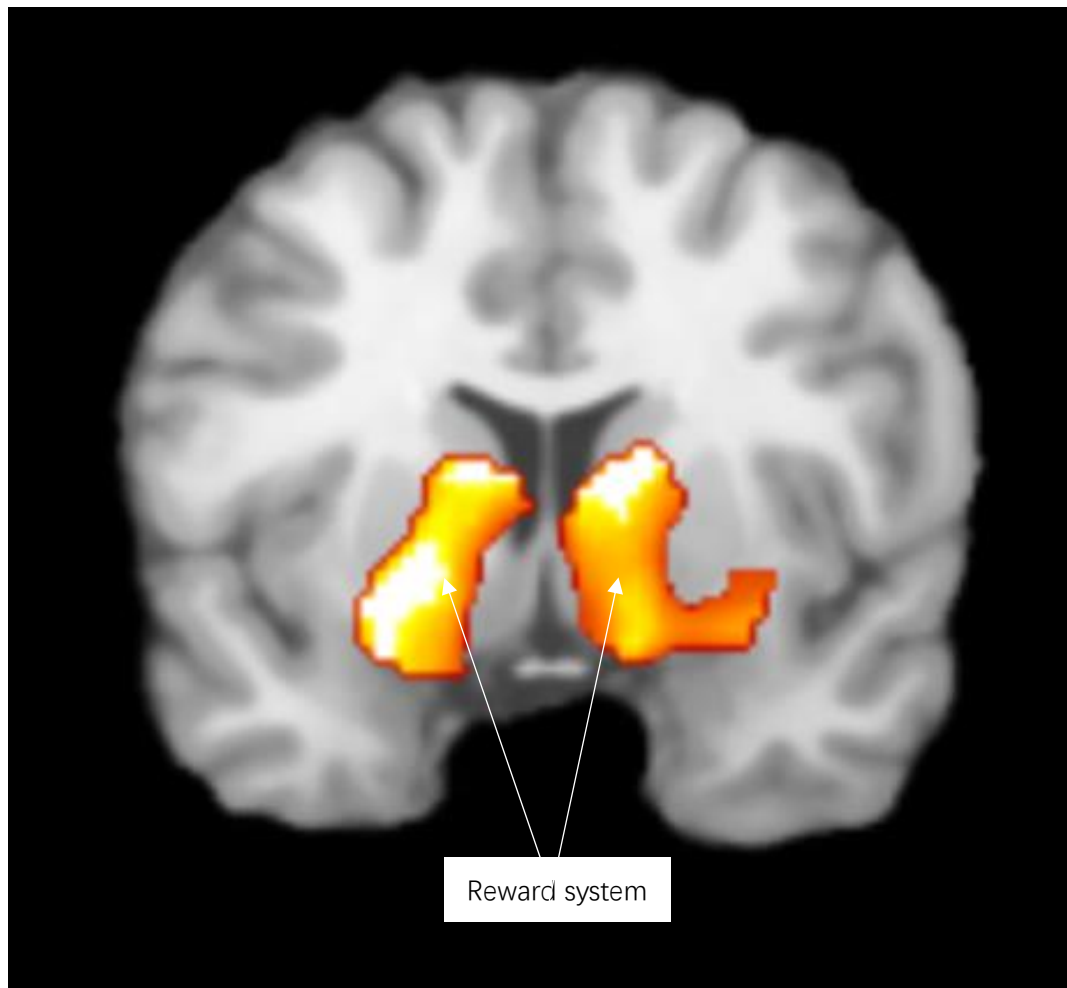

Figure S3. Significant clusters in the ALE contrast meta-analysis showing patterns of specific activation for reward experiments (Clusters in the contrast analyses were thresholded at uncorrected  $p < 0.05$  with 5000 permutations and a minimum cluster size of  $50\text{mm}^3$ ).

**Table S1.** Brain areas activated by prosocial behaviors from ALE analysis

| Region                    | BA | MNI coordinates |     |    |
|---------------------------|----|-----------------|-----|----|
|                           |    | X               | Y   | Z  |
| L Superior Temporal Gyrus | 42 | -64             | -34 | 22 |
| L Temporal Lobe           | 41 | -50             | -30 | 14 |
| L Insula                  | 13 | -59             | -34 | 20 |

*Note.* Cluster-level corrected threshold of  $p < .05$ .

**Table S2.** Brain areas activated by reward from ALE analysis

| Region              | BA | MNI coordinates |     |     |
|---------------------|----|-----------------|-----|-----|
|                     |    | X               | Y   | Z   |
| R Caudate           |    | 12              | 8   | -4  |
| L Lentiform Nucleus |    | -12             | 8   | -4  |
| R Claustrum         |    | 34              | 22  | -2  |
| L Claustrum         |    | -32             | 20  | -6  |
| R Thalamus          |    | 4               | -20 | 12  |
| L Thalamus          |    | -14             | -10 | 14  |
| L Midbrain          |    | -6              | -18 | -12 |
| L Cingulate Gyrus   | 32 | 0               | 30  | 32  |

*Note.* Cluster-level corrected threshold of  $p < .05$ .
